# Supplementary material
Source: publisher site journal article supplement (https://www.spandidos-publications.com/5443/downloadSupplementary)

Figure S1. HAS-2-shRNA downregulates the mRNA expression levels of HAS-2. HAS-2-shRNA silencing efficiency was verified by reverse transcription-quantitative PCR. Data are presented as the mean  $\pm$  SD. \* $P < 0.05$  vs. control group. HAS-2, hyaluronan synthase-2; shRNA, short hairpin RNA.

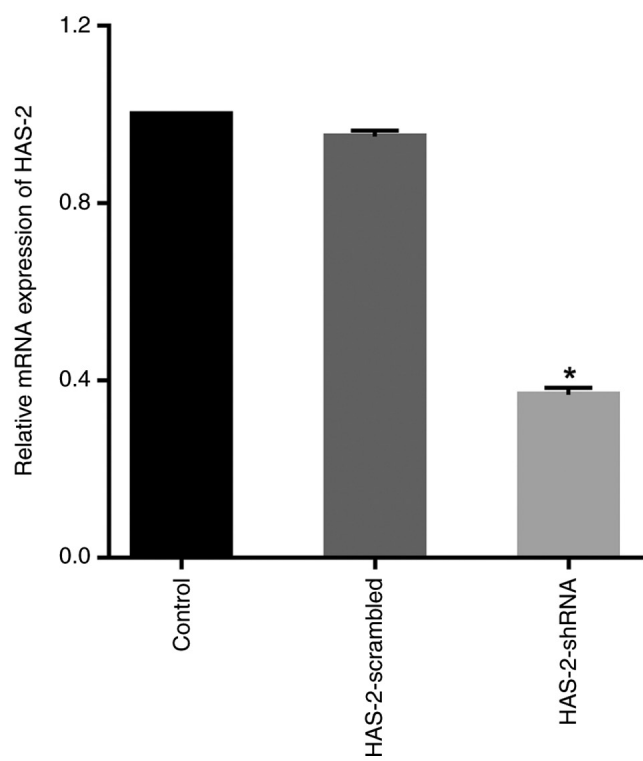

Supplement: Supplementary file 1 [file downloadSupplementary]
